# Supplementary material for: Archaea and Fungi of the Human Gut Microbiome: Correlations with Diet and Bacterial Residents
Source: PLoS One. 2013 Jun 17;8(6):e66019. doi: 10.1371/journal.pone.0066019 (PMC3684604; doi:10.1371/journal.pone.0066019)
Supplement: Table S1 — Permanova of Archaea effects on the Bacterial and Fungal parts of the microbiome. (XLSX) [file pone.0066019.s004.xlsx]

## Sheet: tableS1
Sup TableS1: Permanova of Archaea effects on the Bacterial and Fungal parts of the microbiome.
Permanova pvalues (10000 permutations)	Presence/Absence of any Archaea	Archaeal Groups
Fungal	0.0517	0.001
Bacterial	0.0004	0.0015
