# Supplementary material for: Archaea and Fungi of the Human Gut Microbiome: Correlations with Diet and Bacterial Residents
Source: PLoS One. 2013 Jun 17;8(6):e66019. doi: 10.1371/journal.pone.0066019 (PMC3684604; doi:10.1371/journal.pone.0066019)
Supplement: Table S2 — Permanova of Fungal Phyla with Bacteria. (XLSX) [file pone.0066019.s005.xlsx]

## Sheet: tableS2
Sup Table S2: Fungal Phyla permanova with Bacteria
	GUniFrac	unweighted	weighted
Ascomycota	0.0202	0.2948	0.0205
Basidiomycota	0.0037	0.5404	0.004
unknownFungi	0.6174	0.3934	0.9009
