# Supplementary material for: Archaea and Fungi of the Human Gut Microbiome: Correlations with Diet and Bacterial Residents
Source: PLoS One. 2013 Jun 17;8(6):e66019. doi: 10.1371/journal.pone.0066019 (PMC3684604; doi:10.1371/journal.pone.0066019)
Supplement: Table S4 — Permanova analysis of the association between recent dietary groups and bacterial, fungal, and archaeal lineages. (XLSX) [file pone.0066019.s007.xlsx]

## Sheet: TableS4
Sup Table S4: Recent Nutrient Cluster Permanova
				unweighted					weigheted
Cluster Number	%var explained	within cluster correlation mean	cluster name	Bacteria	Fungi	Bacteria + Fungi	Archaea + Bacteria + Fungi		Bacteria	Fungi	Bacteria + Fungi	Archaea + Bacteria + Fungi
1	81.0611	0.725148	Energy/Glycemic Load/ Cholest2SFA ratio	0.0079	0.3449	0.0225	0.0233		0.2366	0.4101	0.4496	0.2547
2	66.8763	0.60189	Total Fat/ %cal from fat	0.0728	0.3847	0.0714	0.023		0.677	0.0952	0.2178	0.0083
3	66.7798	0.604772	Total Carb/ simple sugars/ Total Sugar/ Added Sugars	0.1148	0.3822	0.0846	0.0572		0.3148	0.008	0.0128	0.0184
4	84.1594	0.837474	Total Prot/ AA/ %cal From Prot/ Nitrogen	0.7405	0.5593	0.6949	0.7413		0.6167	0.1384	0.2051	0.3144
5	61.6193	0.576049	Total, soluble, insoluble fiber/ Veg Prot	0.0341	0.9058	0.1798	0.2362		0.0675	0.9087	0.4663	0.8005
6	51.5524	0.453488	Alcohol/ vit A, beta carotene/ betaine	0.023	0.9968	0.1716	0.2126		0.1254	0.9083	0.4644	0.7831
7	50.4861	0.408945	PUFA (Arachdonic, EPA, DHA, DPA)/ choline/ cholesterol	0.776	0.8822	0.8451	0.8293		0.4506	0.6412	0.5281	0.5617
8	63.4621	0.576523	total SFA/ %cal from sfa/ CLA/ myristoleic and palmotoleic MUFA	0.2533	0.6779	0.4673	0.4139		0.0199	0.0429	0.0102	0.0297
9	67.0165	0.650291	total polyUnsaturated FA/ omega3	0.1529	0.3506	0.179	0.1995		0.0739	0.751	0.4135	0.5166
10	20.8847	0.136804	maltose/ starch/ calcium/ galactose/ lycopene/ sweetners	0.3038	0.6802	0.4807	0.47		0.1362	0.9875	0.6697	0.881
11	51.3659	0.444837	lactose/ retinol/vit D/ B complex/ Iron	0.0832	0.2216	0.0681	0.0762		0.2989	0.6899	0.5792	0.5361
12	69.3212	0.626662	vit E	0.0681	0.7118	0.1895	0.2147		0.6347	0.6584	0.7542	0.7051
13	78.0871	0.800711	Sat. short chain FA	0.4068	0.585	0.475	0.5179		0.0432	0.0708	0.0229	0.077
14	61.7602	0.534645	glycemic index/ trans fat	0.0863	0.2675	0.0654	0.0632		0.0064	0.9117	0.1252	0.1756
15	91.2685	0.810077	Daidzein/ Genistein/ Glycitein/ Pinitol	0.1682	0.7607	0.3877	0.2994		0.5967	0.6106	0.6851	0.561
