# Supplementary material for: Archaea and Fungi of the Human Gut Microbiome: Correlations with Diet and Bacterial Residents
Source: PLoS One. 2013 Jun 17;8(6):e66019. doi: 10.1371/journal.pone.0066019 (PMC3684604; doi:10.1371/journal.pone.0066019)
Supplement: Table S8 — Permanova analysis of the association between demographic factors and bacterial, fungal, and archaeal lineages. (XLSX) [file pone.0066019.s011.xlsx]

## Sheet: tableS8
Sup table S8: demographics permanova
	unweighted unifrac					weighted unifrac					Fishers Exact
Demografic Factor	Bacteria	Fungi	Bacteria + Fungi	Archaea + Bacteria + Fungi	category count	Bacteria	Fungi	Bacteria + Fungi	Archaea + Bacteria + Fungi		Archaea
sex	0.2125	0.4508	0.2085	0.1924	F M 55 43	0.0068	0.9033	0.153	0.0835		0.871395
age	0.3594	0.2954	0.2109	0.2592	O Y 81 17	0.632	0.759	0.8129	0.698		0.463982
eth	0.9332	0.003	0.3394	0.3283	L NL 3 92	0.4297	0.0318	0.0936	0.1923		1
race	0.0109	0.7467	0.0153	0.0249	A B W 7 25 65	0.0647	0.7901	0.2926	0.7123		0.920628
bmi	0.0309	0.5236	0.0414	0.0515	1 2 3 60 28 10	0.1072	0.3737	0.1364	0.4122		0.529544
smoke	0.7314	0.0076	0.3009	0.318	C N P 2 88 8	0.6444	0.272	0.5325	0.481		1
alco	0.0047	0.8937	0.0056	0.0088	0 1 2 42 23 24	0.3447	0.9436	0.6829	0.4842		0.974827
yogurt	0.1588	0.5794	0.2228	0.2498	0 1 32 49	0.2711	0.6758	0.6646	0.5835		1
bowel	0.6091	0.6238	0.7784	0.789	2 4 5 14 52 32	0.6642	0.7466	0.6471	0.7835		0.424968
append	0.5949	0.5517	0.8057	0.8398	0 1 91 7	0.603	0.45	0.7143	0.7549		1
household	0.3843	0.7457	0.5916	0.6538	0 1 3 5 18 35 33 6	0.4198	0.9778	0.8941	0.9846		0.975349
child3	0.1668	0.413	0.2323	0.2344	0 1 82 10	0.0935	0.6142	0.2273	0.4195		0.406041
child5	0.1341	0.8824	0.2929	0.3312	0 1 78 14	0.1801	0.4245	0.3233	0.4521		0.760608
child15	0.4164	0.4076	0.3611	0.3293	0 1 80 12	0.328	0.7178	0.5241	0.5678		1
income	0.3564	0.2904	0.153	0.0977	1 2 3 4 22 32 16 26	0.0699	0.0595	0.0214	0.1267		0.918746
residence	0.7048	0.9786	0.9642	0.9448	1 2 3 63 32 2	0.0265	0.7537	0.1577	0.3089		1
tapwater	0.2304	0.2801	0.2383	0.2767	1 2 3 23 38 37	0.4534	0.2541	0.4166	0.2276		0.0389915
veg	0.9322	0.2322	0.7978	0.8494	0 1 87 11	0.1737	0.564	0.4033	0.641		0.345762
vegan	0.3812	0.973	0.6587	0.6835	0 1 97 1	0.1223	0.8874	0.5263	0.521		1
pet	0.3117	0.852	0.6197	0.6908	0 1 59 39	0.0832	0.6435	0.172	0.3529		0.300393
swim	0.2188	0.4703	0.2458	0.276	0 1 82 16	0.6972	0.3644	0.5146	0.4004		0.345762
