# Supplementary material for: Archaea and Fungi of the Human Gut Microbiome: Correlations with Diet and Bacterial Residents
Source: PLoS One. 2013 Jun 17;8(6):e66019. doi: 10.1371/journal.pone.0066019 (PMC3684604; doi:10.1371/journal.pone.0066019)
Supplement: Table S9 — Co-occurring genera according to the calculated Dice index. (XLSX) [file pone.0066019.s012.xlsx]

## Sheet: tableS9
Sup Table S9: Co-occurring genera according to the calcualted Dice index.
		Dice Index
Lachnospiraceae-unkGen	Bacteroides	0.989691
Ruminococcaceae-unkGen	Bacteroides	0.917127
Ruminococcaceae-unkGen	Lachnospiraceae-unkGen	0.916201
Parabacteroides	Bacteroides	0.911111
Lachnospiraceae-unkGen	Faecalibacterium	0.909091
Faecalibacterium	Bacteroides	0.898876
Parabacteroides	Lachnospiraceae-unkGen	0.898876
Ruminococcaceae-unkGen	Faecalibacterium	0.895706
Bacteroides	Alistipes	0.892655
Lachnospiraceae-unkGen	Alistipes	0.891429
Ruminococcaceae-unkGen	Alistipes	0.876543
Saccharomyces	Lachnospiraceae-unkGen	0.857143
Ruminococcaceae-unkGen	Parabacteroides	0.848485
Saccharomyces	Bacteroides	0.847059
Parabacteroides	Alistipes	0.84472
Saccharomyces	Parabacteroides	0.818182
Faecalibacterium	Alistipes	0.81761
Parabacteroides	Faecalibacterium	0.802469
Saccharomyces	Ruminococcaceae-unkGen	0.8
Saccharomyces	Alistipes	0.794702
Saccharomyces	Faecalibacterium	0.789474
Roseburia	Faecalibacterium	0.75
Roseburia	Lachnospiraceae-unkGen	0.736842
Ruminococcaceae-unkGen	Roseburia	0.733813
Roseburia	Bacteroides	0.727273
Subdoligranulum	Faecalibacterium	0.703125
Subdoligranulum	Ruminococcaceae-unkGen	0.70229
Prevotellaceae-unkGen	Prevotella	0.684211
Saccharomyces	Roseburia	0.671875
Roseburia	Alistipes	0.666667
Subdoligranulum	Lachnospiraceae-unkGen	0.666667
TM7_genera_incertae_sedis	Peptostreptococcaceae-unkGen	0.666667
Streptococcus	Porphyromonadaceae-unkGen	0.666667
Subdoligranulum	Alistipes	0.661417
Subdoligranulum	Bacteroides	0.657534
Roseburia	Parabacteroides	0.652174
Subdoligranulum	Parabacteroides	0.630769
Ruminococcaceae-unkGen	Candida	0.619048
Candida	Bacteroides	0.609929
Lachnospiraceae-unkGen	Candida	0.604317
Faecalibacterium	Candida	0.601626
Subdoligranulum	Saccharomyces	0.583333
Subdoligranulum	Roseburia	0.576923
Saccharomyces	Candida	0.573913
Roseburia	Candida	0.545455
Ruminococcaceae-unkGen	Methanobrevibacter	0.530973
Parabacteroides	Candida	0.528
Candida	Alistipes	0.52459
Veillonellaceae-unkGen	Lachnospiraceae-unkGen	0.523077
Veillonellaceae-unkGen	Bacteroides	0.515152
Faecalibacterium	Cladosporium	0.509091
Methanobrevibacter	Faecalibacterium	0.509091
Pichia	Catenibacterium	0.5
Peptostreptococcaceae-unkGen	Coprobacillus	0.5
Megasphaera	Dorea	0.5
TM7_genera_incertae_sedis	Megasphaera	0.5
Veillonellaceae-unkGen	Alistipes	0.495575
Methanobrevibacter	Alistipes	0.495413
Veillonellaceae-unkGen	Faecalibacterium	0.491228
Subdoligranulum	Candida	0.483516
Veillonellaceae-unkGen	Parabacteroides	0.482759
Ruminococcaceae-unkGen	Cladosporium	0.477876
Prevotella	Candida	0.477612
Ruminococcus	Alistipes	0.47619
Lachnospiraceae-unkGen	Cladosporium	0.47619
Methanobrevibacter	Lachnospiraceae-unkGen	0.47619
Veillonellaceae-unkGen	Saccharomyces	0.471698
Cladosporium	Bacteroides	0.46875
Methanobrevibacter	Bacteroides	0.46875
Subdoligranulum	Methanobrevibacter	0.461538
Ruminococcus	Ruminococcaceae-unkGen	0.458716
Sutterella	Saccharomyces	0.446809
Parabacteroides	Methanobrevibacter	0.446429
Ruminococcus	Parabacteroides	0.444444
Veillonellaceae-unkGen	Ruminococcaceae-unkGen	0.444444
Prevotella	Faecalibacterium	0.442308
Roseburia	Cladosporium	0.44186
Methanobrevibacter	Candida	0.438356
Subdoligranulum	Ruminococcus	0.432432
Ruminococcus	Methanobrevibacter	0.428571
Saccharomyces	Ruminococcus	0.428571
Ruminococcus	Lachnospiraceae-unkGen	0.42623
Cladosporium	Alistipes	0.422018
Saccharomyces	Erysipelotrichaceae-unkGen	0.421053
Ruminococcus	Bacteroides	0.419355
Nitrososphaera	Alternaria	0.416667
Methanobrevibacter	Erysipelotrichaceae-unkGen	0.415094
Ruminococcaceae-unkGen	Erysipelotrichaceae-unkGen	0.415094
Saccharomyces	Cladosporium	0.411765
Saccharomyces	Methanobrevibacter	0.411765
Ruminococcus	Erysipelotrichaceae-unkGen	0.408163
Faecalibacterium	Erysipelotrichaceae-unkGen	0.407767
Prevotella	Methanobrevibacter	0.407407
Veillonellaceae-unkGen	Cladosporium	0.40625
Veillonellaceae-unkGen	Methanobrevibacter	0.40625
Megasphaera	Catenibacterium	0.4
Nitrososphaera	Fusarium	0.4
Prevotella	Lachnospiraceae-unkGen	0.4
Peptostreptococcaceae-unkGen	Megasphaera	0.4
Pichia	Megasphaera	0.4
Prevotella	Bacteroides	0.393443
Ruminococcaceae-unkGen	Prevotella	0.392523
Veillonellaceae-unkGen	Subdoligranulum	0.390244
Lachnospiraceae-unkGen	Erysipelotrichaceae-unkGen	0.386555
Subdoligranulum	Cladosporium	0.384615
Sutterella	Roseburia	0.384615
Cladosporium	Candida	0.383562
Erysipelotrichaceae-unkGen	Bacteroides	0.380165
Roseburia	Erysipelotrichaceae-unkGen	0.379747
Ruminococcus	Faecalibacterium	0.377358
Roseburia	Prevotella	0.375
Saccharomyces	Prevotella	0.375
Sutterella	Lachnospiraceae-unkGen	0.372881
Sutterella	Faecalibacterium	0.372549
Prevotella	Alistipes	0.368932
Sutterella	Bacteroides	0.366667
Methanobrevibacter	Cladosporium	0.366667
Dorea	Cystofilobasidium	0.363636
Rhodotorula	Nitrososphaera	0.363636
Parabacteroides	Erysipelotrichaceae-unkGen	0.361905
Cystofilobasidium	Aspergillus	0.357143
Parabacteroides	Cladosporium	0.357143
Veillonellaceae-unkGen	Sutterella	0.357143
Roseburia	Cystofilobasidium	0.356164
Subdoligranulum	Cryptococcus	0.354839
Erysipelotrichaceae-unkGen	Alistipes	0.352941
Roseburia	Dialister	0.351351
Prevotellaceae-unkGen	Candida	0.350877
Roseburia	Methanobrevibacter	0.348837
Debaryomyces	Aspergillus	0.347826
Sutterella	Parabacteroides	0.346154
Roseburia	Nitrososphaera	0.342857
Sutterella	Ruminococcaceae-unkGen	0.342857
Ruminococcus	Roseburia	0.341463
Prevotella	Parabacteroides	0.339623
Sutterella	Candida	0.338462
Subdoligranulum	Erysipelotrichaceae-unkGen	0.338028
Veillonellaceae-unkGen	Candida	0.337662
Prevotella	Cladosporium	0.333333
Prevotella	Debaryomyces	0.333333
Prevotella	Dialister	0.333333
Streptococcus	Dorea	0.333333
TM7_genera_incertae_sedis	Dorea	0.333333
Veillonellaceae-unkGen	Roseburia	0.333333
Cystofilobasidium	Cryptococcus	0.322581
Nitrososphaera	Cystofilobasidium	0.322581
Parabacteroides	Dialister	0.32
Nitrososphaera	Cladosporium	0.318182
Prevotellaceae-unkGen	Cladosporium	0.318182
Prevotellaceae-unkGen	Methanobrevibacter	0.318182
Sutterella	Alistipes	0.316832
Ruminococcaceae-unkGen	Dialister	0.316832
Dialister	Cryptococcus	0.3125
Dialister	Bacteroides	0.310345
Veillonellaceae-unkGen	Prevotella	0.310345
Coprobacillus	Aspergillus	0.307692
Prevotellaceae-unkGen	Debaryomyces	0.307692
Faecalibacterium	Dialister	0.306122
Erysipelotrichaceae-unkGen	Candida	0.30303
Lachnospiraceae-unkGen	Cystofilobasidium	0.300885
Lachnospiraceae-unkGen	Dialister	0.298246
Meyerozyma	Alistipes	0.297872
Cystofilobasidium	Cladosporium	0.297872
Prevotellaceae-unkGen	Faecalibacterium	0.297872
Cystofilobasidium	Bacteroides	0.295652
Dialister	Candida	0.295082
Cladosporium	Aspergillus	0.292683
Saccharomyces	Cystofilobasidium	0.292135
Debaryomyces	Candida	0.290909
Saccharomyces	Dialister	0.288889
Dialister	Alistipes	0.28866
Ruminococcaceae-unkGen	Cryptococcus	0.28866
Fusarium	Alternaria	0.285714
Dorea	Catenibacterium	0.285714
Debaryomyces	Coprobacillus	0.285714
Roseburia	Cryptococcus	0.285714
Dialister	Cystofilobasidium	0.285714
Peptostreptococcaceae-unkGen	Dorea	0.285714
Pichia	Dorea	0.285714
Porphyromonadaceae-unkGen	Dorea	0.285714
Ruminococcaceae-unkGen	Meyerozyma	0.285714
Roseburia	Prevotellaceae-unkGen	0.285714
Ruminococcaceae-unkGen	Cystofilobasidium	0.28
Cryptococcus	Alistipes	0.27957
Saccharomyces	Cryptococcus	0.27907
Subdoligranulum	Prevotella	0.277778
Subdoligranulum	Cystofilobasidium	0.276923
Faecalibacterium	Cryptococcus	0.276596
Nitrososphaera	Faecalibacterium	0.276596
Debaryomyces	Cystofilobasidium	0.275862
Veillonellaceae-unkGen	Cystofilobasidium	0.27451
Subdoligranulum	Dialister	0.272727
Faecalibacterium	Cystofilobasidium	0.268041
Parabacteroides	Meyerozyma	0.268041
Veillonellaceae-unkGen	Aspergillus	0.266667
Cystofilobasidium	Candida	0.266667
Dialister	Debaryomyces	0.266667
Sutterella	Erysipelotrichaceae-unkGen	0.266667
Meyerozyma	Bacteroides	0.265487
Parabacteroides	Cystofilobasidium	0.262626
Ruminococcus	Candida	0.26087
Dorea	Dialister	0.26087
Sutterella	Prevotella	0.26087
Erysipelotrichaceae-unkGen	Coprococcus	0.258065
Subdoligranulum	Nitrososphaera	0.258065
Lachnospiraceae-unkGen	Cryptococcus	0.254545
Nitrososphaera	Lachnospiraceae-unkGen	0.254545
Prevotellaceae-unkGen	Lachnospiraceae-unkGen	0.254545
Meyerozyma	Lachnospiraceae-unkGen	0.252252
Prevotellaceae-unkGen	Alternaria	0.25
Sutterella	Alternaria	0.25
Cryptococcus	Bacteroides	0.25
Nitrososphaera	Bacteroides	0.25
Prevotellaceae-unkGen	Bacteroides	0.25
Ruminococcus	Cladosporium	0.25
Rhodotorula	Coprococcus	0.25
Parabacteroides	Cryptococcus	0.25
Nitrososphaera	Dialister	0.25
Prevotellaceae-unkGen	Dialister	0.25
Pichia	Nitrososphaera	0.25
Ruminococcaceae-unkGen	Nitrososphaera	0.247423
Ruminococcaceae-unkGen	Prevotellaceae-unkGen	0.247423
Cryptococcus	Candida	0.245614
Ruminococcus	Meyerozyma	0.243902
Roseburia	Alternaria	0.242424
Nitrososphaera	Aspergillus	0.24
Ruminococcus	Prevotella	0.24
Roseburia	Fusarium	0.238806
Coprococcus	Candida	0.235294
Sutterella	Debaryomyces	0.235294
Fusarium	Erysipelotrichaceae-unkGen	0.235294
Nitrososphaera	Megasphaera	0.235294
Veillonellaceae-unkGen	Ruminococcus	0.233333
Saccharomyces	Nitrososphaera	0.232558
Sutterella	Cladosporium	0.230769
Erysipelotrichaceae-unkGen	Debaryomyces	0.228571
Cryptococcus	Cladosporium	0.227273
Erysipelotrichaceae-unkGen	Cladosporium	0.226415
Faecalibacterium	Alternaria	0.222222
Rhodotorula	Alternaria	0.222222
Candida	Aspergillus	0.222222
Fusarium	Candida	0.222222
Lachnospiraceae-unkGen	Debaryomyces	0.222222
Veillonellaceae-unkGen	Fusarium	0.222222
Rhodotorula	IncertaeSedisXIII-unkGen	0.222222
Subdoligranulum	Meyerozyma	0.222222
Sutterella	Nitrososphaera	0.222222
Sutterella	Prevotellaceae-unkGen	0.222222
Roseburia	Coprococcus	0.21875
Debaryomyces	Bacteroides	0.218182
Faecalibacterium	Debaryomyces	0.217391
Saccharomyces	Fusarium	0.216867
Erysipelotrichaceae-unkGen	Cryptococcus	0.216216
Nitrososphaera	Alistipes	0.215054
Prevotellaceae-unkGen	Alistipes	0.215054
Dialister	Alternaria	0.214286
Nitrososphaera	Cryptococcus	0.214286
Saccharomyces	Debaryomyces	0.214286
Subdoligranulum	Rhodotorula	0.214286
Parabacteroides	Debaryomyces	0.212766
Prevotella	Erysipelotrichaceae-unkGen	0.212766
Nitrososphaera	Candida	0.210526
Coprococcus	Cladosporium	0.210526
Cystofilobasidium	Coprobacillus	0.210526
Peptostreptococcaceae-unkGen	Cystofilobasidium	0.210526
Ruminococcaceae-unkGen	Debaryomyces	0.210526
Nitrososphaera	Dorea	0.210526
Veillonellaceae-unkGen	Erysipelotrichaceae-unkGen	0.210526
Meyerozyma	Faecalibacterium	0.210526
Saccharomyces	Prevotellaceae-unkGen	0.209302
Roseburia	Aspergillus	0.208955
Dialister	Cladosporium	0.208333
Parabacteroides	Nitrososphaera	0.208333
Veillonellaceae-unkGen	Nitrososphaera	0.208333
Veillonellaceae-unkGen	Prevotellaceae-unkGen	0.208333
Sutterella	Ruminococcus	0.208333
Meyerozyma	Cryptococcus	0.206897
Saccharomyces	Meyerozyma	0.206897
Roseburia	Debaryomyces	0.205882
Lachnospiraceae-unkGen	Fusarium	0.205607
Sutterella	Cystofilobasidium	0.205128
Subdoligranulum	Aspergillus	0.20339
Bacteroides	Aspergillus	0.201835
Fusarium	Bacteroides	0.201835
Aspergillus	Alistipes	0.2
Fusarium	Alistipes	0.2
Coprococcus	Catenibacterium	0.2
Debaryomyces	Coprococcus	0.2
Sutterella	Coprococcus	0.2
Ruminococcus	Cryptococcus	0.2
Megasphaera	Cystofilobasidium	0.2
Sutterella	Subdoligranulum	0.2
Debaryomyces	Alistipes	0.197802
Fusarium	Faecalibacterium	0.197802
Parabacteroides	Alternaria	0.195652
Saccharomyces	Alternaria	0.195122
Prevotella	Cystofilobasidium	0.195122
Parabacteroides	Fusarium	0.193548
Sutterella	Methanobrevibacter	0.192308
Veillonellaceae-unkGen	Coprococcus	0.190476
Lachnospiraceae-unkGen	Alternaria	0.188679
Cystofilobasidium	Alistipes	0.1875
Prevotella	Coprococcus	0.1875
Lachnospiraceae-unkGen	Aspergillus	0.186916
Bacteroides	Alternaria	0.185185
Clostridium	Alternaria	0.181818
Collinsella	Alternaria	0.181818
Debaryomyces	Alternaria	0.181818
IncertaeSedisXIII-unkGen	Alternaria	0.181818
Veillonellaceae-unkGen	Alternaria	0.181818
Faecalibacterium	Coprococcus	0.181818
Nitrososphaera	Coprococcus	0.181818
Rhodotorula	Cryptococcus	0.181818
Meyerozyma	Dialister	0.181818
Ruminococcus	Dialister	0.181818
Rhodotorula	Faecalibacterium	0.181818
Sutterella	Fusarium	0.181818
Subdoligranulum	Coprococcus	0.178571
Prevotella	Alternaria	0.176471
Ruminococcus	Coprococcus	0.176471
Faecalibacterium	Aspergillus	0.175824
Ruminococcaceae-unkGen	Coprococcus	0.175824
Ruminococcaceae-unkGen	Rhodotorula	0.175824
Saccharomyces	Coprococcus	0.175
Veillonellaceae-unkGen	Debaryomyces	0.173913
Rhodotorula	Meyerozyma	0.173913
Subdoligranulum	Alternaria	0.172414
Ruminococcaceae-unkGen	Alternaria	0.172043
Prevotella	Aspergillus	0.171429
Dorea	Cladosporium	0.171429
Ruminococcaceae-unkGen	Aspergillus	0.170213
Ruminococcaceae-unkGen	Fusarium	0.170213
Saccharomyces	Aspergillus	0.168675
Fusarium	Collinsella	0.166667
Sutterella	Coprobacillus	0.166667
Subdoligranulum	Debaryomyces	0.166667
Methanobrevibacter	Dialister	0.166667
Sutterella	Megamonas	0.166667
Prevotellaceae-unkGen	Parabacteroides	0.166667
Subdoligranulum	Prevotellaceae-unkGen	0.16129
Coprococcus	Alistipes	0.16092
Prevotellaceae-unkGen	Aspergillus	0.16
Fusarium	Cryptococcus	0.16
Rhodotorula	Cystofilobasidium	0.16
Prevotellaceae-unkGen	Fusarium	0.16
Methanobrevibacter	Coprococcus	0.157895
Meyerozyma	Erysipelotrichaceae-unkGen	0.157895
Alternaria	Alistipes	0.157303
Roseburia	Rhodotorula	0.15625
Rhodotorula	Parabacteroides	0.155556
Catenibacterium	Aspergillus	0.153846
Peptostreptococcaceae-unkGen	Aspergillus	0.153846
Pichia	Aspergillus	0.153846
Fusarium	Catenibacterium	0.153846
Lachnospiraceae-unkGen	Coprococcus	0.153846
Debaryomyces	Cryptococcus	0.153846
Nitrososphaera	Debaryomyces	0.153846
Rhodotorula	Dialister	0.153846
Megamonas	Fusarium	0.153846
Rhodotorula	Lachnospiraceae-unkGen	0.153846
Prevotella	Meyerozyma	0.153846
Candida	Alternaria	0.150943
Coprococcus	Bacteroides	0.150943
Rhodotorula	Bacteroides	0.150943
Parabacteroides	Aspergillus	0.150538
Cladosporium	Alternaria	0.15
Erysipelotrichaceae-unkGen	Cystofilobasidium	0.15
Ruminococcus	Nitrososphaera	0.15
Ruminococcus	Prevotellaceae-unkGen	0.15
Saccharomyces	Rhodotorula	0.15
Megasphaera	Aspergillus	0.142857
Ruminococcus	Catenibacterium	0.142857
Debaryomyces	Cladosporium	0.142857
Fusarium	Cystofilobasidium	0.142857
Methanobrevibacter	Debaryomyces	0.142857
Peptostreptococcaceae-unkGen	Debaryomyces	0.142857
Prevotellaceae-unkGen	Nitrososphaera	0.142857
Ruminococcus	Porphyromonadaceae-unkGen	0.142857
Veillonellaceae-unkGen	Rhodotorula	0.142857
Roseburia	Meyerozyma	0.140845
Ruminococcus	Cystofilobasidium	0.139535
Ruminococcus	Megasphaera	0.137931
Methanobrevibacter	Cryptococcus	0.136364
Nitrososphaera	Methanobrevibacter	0.136364
Subdoligranulum	Fusarium	0.135593
Nitrososphaera	Collinsella	0.133333
Parabacteroides	Coprococcus	0.133333
Streptococcus	Cryptococcus	0.133333
Prevotellaceae-unkGen	Fusobacterium	0.133333
Meyerozyma	Methanobrevibacter	0.133333
TM7_genera_incertae_sedis	Nitrososphaera	0.133333
Prevotellaceae-unkGen	Cystofilobasidium	0.129032
Ruminococcus	Dorea	0.129032
Rhodotorula	Erysipelotrichaceae-unkGen	0.129032
Dorea	Aspergillus	0.125
Cladosporium	Catenibacterium	0.125
Nitrososphaera	Catenibacterium	0.125
Prevotellaceae-unkGen	Catenibacterium	0.125
Megamonas	Cladosporium	0.125
Cryptococcus	Coprobacillus	0.125
Nitrososphaera	Coprobacillus	0.125
Peptostreptococcaceae-unkGen	Cryptococcus	0.125
Porphyromonadaceae-unkGen	Cryptococcus	0.125
Nitrososphaera	Megamonas	0.125
Peptostreptococcaceae-unkGen	Nitrososphaera	0.125
Veillonellaceae-unkGen	Meyerozyma	0.122449
Erysipelotrichaceae-unkGen	Alternaria	0.121212
Sutterella	Aspergillus	0.121212
Megasphaera	Cladosporium	0.121212
Rhodotorula	Candida	0.117647
Dorea	Debaryomyces	0.117647
Porphyromonadaceae-unkGen	Meyerozyma	0.117647
Rhodotorula	Alistipes	0.114943
Prevotella	Fusarium	0.114286
Coprococcus	Alternaria	0.111111
Sutterella	Cryptococcus	0.111111
Streptococcus	Cystofilobasidium	0.111111
TM7_genera_incertae_sedis	Cystofilobasidium	0.111111
Ruminococcus	Aspergillus	0.108108
Nitrososphaera	Erysipelotrichaceae-unkGen	0.108108
Prevotellaceae-unkGen	Erysipelotrichaceae-unkGen	0.108108
Ruminococcus	Fusarium	0.108108
Veillonellaceae-unkGen	Megasphaera	0.108108
Coprococcus	Aspergillus	0.105263
Cystofilobasidium	Catenibacterium	0.105263
Rhodotorula	Cladosporium	0.105263
Fusarium	Coprococcus	0.105263
Dorea	Cryptococcus	0.105263
Megamonas	Cystofilobasidium	0.105263
Pichia	Cystofilobasidium	0.105263
Porphyromonadaceae-unkGen	Cystofilobasidium	0.105263
Ruminococcus	Debaryomyces	0.105263
Lachnospira	Dialister	0.105263
Streptococcus	Dialister	0.105263
TM7_genera_incertae_sedis	Dialister	0.105263
Prevotellaceae-unkGen	Dorea	0.105263
Rhodotorula	Fusarium	0.105263
Rhodotorula	Methanobrevibacter	0.105263
Prevotella	Nitrososphaera	0.105263
Methanobrevibacter	Alternaria	0.1
Peptostreptococcaceae-unkGen	Dialister	0.1
Porphyromonadaceae-unkGen	Dialister	0.1
Sutterella	Dialister	0.1
Lachnospiraceae-unkGen	Dorea	0.0990099
Fusarium	Cladosporium	0.097561
Erysipelotrichaceae-unkGen	Dialister	0.097561
Methanobrevibacter	Fusarium	0.097561
Dorea	Bacteroides	0.0970874
Aspergillus	Alternaria	0.0952381
Megasphaera	Dialister	0.0952381
Prevotellaceae-unkGen	Coprococcus	0.0909091
Coprobacillus	Candida	0.0888889
Megamonas	Candida	0.0888889
Fusarium	Debaryomyces	0.0869565
Sutterella	Fusobacterium	0.0869565
Sutterella	Lachnospira	0.0869565
Dorea	Candida	0.0833333
Sutterella	Catenibacterium	0.0833333
Veillonellaceae-unkGen	Cryptococcus	0.0833333
Lactobacillus	Erysipelotrichaceae-unkGen	0.0833333
Sutterella	Peptostreptococcaceae-unkGen	0.0833333
Sutterella	Pichia	0.0833333
Cryptococcus	Aspergillus	0.08
Erysipelotrichaceae-unkGen	Catenibacterium	0.08
Erysipelotrichaceae-unkGen	Coprobacillus	0.08
Cystofilobasidium	Coprococcus	0.08
Prevotella	Fusobacterium	0.08
Prevotella	Lactobacillus	0.08
Sutterella	Megasphaera	0.08
Subdoligranulum	Megasphaera	0.0784314
Prevotella	Catenibacterium	0.0769231
Veillonellaceae-unkGen	Dialister	0.0769231
Meyerozyma	Fusarium	0.0769231
Subdoligranulum	Dorea	0.0754717
Cystofilobasidium	Alternaria	0.0740741
Meyerozyma	Debaryomyces	0.0740741
Ruminococcus	Lactobacillus	0.0740741
Streptococcus	Ruminococcus	0.0740741
Ruminococcus	Pichia	0.0714286
Faecalibacterium	Dorea	0.0705882
Dialister	Aspergillus	0.0689655
Roseburia	Catenibacterium	0.0689655
Roseburia	Coprobacillus	0.0689655
Fusarium	Dialister	0.0689655
Parabacteroides	Dorea	0.0689655
Prevotella	Dorea	0.0689655
Nitrososphaera	Meyerozyma	0.0689655
Prevotellaceae-unkGen	Meyerozyma	0.0689655
Roseburia	Pichia	0.0689655
Ruminococcaceae-unkGen	Dorea	0.0681818
Roseburia	Megasphaera	0.0677966
Fusobacterium	Cladosporium	0.0645161
TM7_genera_incertae_sedis	Cladosporium	0.0645161
Methanobrevibacter	Lactobacillus	0.0645161
Peptostreptococcaceae-unkGen	Cladosporium	0.0625
Pichia	Cladosporium	0.0625
Meyerozyma	Cystofilobasidium	0.0625
Methanobrevibacter	Megamonas	0.0625
Megasphaera	Lachnospiraceae-unkGen	0.0606061
Megasphaera	Bacteroides	0.0594059
Erysipelotrichaceae-unkGen	Aspergillus	0.0588235
Ruminococcus	Rhodotorula	0.0588235
Veillonellaceae-unkGen	Collinsella	0.0571429
Methanobrevibacter	Dorea	0.0571429
Veillonellaceae-unkGen	TM7_genera_incertae_sedis	0.0571429
Ruminococcus	Alternaria	0.0555556
Veillonellaceae-unkGen	Megamonas	0.0555556
Veillonellaceae-unkGen	Peptostreptococcaceae-unkGen	0.0555556
Veillonellaceae-unkGen	Pichia	0.0555556
Saccharomyces	Coprobacillus	0.0540541
Saccharomyces	Megamonas	0.0540541
Saccharomyces	Porphyromonadaceae-unkGen	0.0540541
Prevotella	Cryptococcus	0.0526316
Veillonellaceae-unkGen	Dorea	0.0512821
Catenibacterium	Alistipes	0.0493827
Pichia	Alistipes	0.0493827
Porphyromonadaceae-unkGen	Alistipes	0.0493827
Megasphaera	Alistipes	0.0487805
Methanobrevibacter	Aspergillus	0.0487805
Faecalibacterium	Catenibacterium	0.0487805
Megamonas	Faecalibacterium	0.0487805
Peptostreptococcaceae-unkGen	Faecalibacterium	0.0487805
Pichia	Faecalibacterium	0.0487805
Megasphaera	Faecalibacterium	0.0481928
Dorea	Alistipes	0.047619
Parabacteroides	Megamonas	0.047619
Porphyromonadaceae-unkGen	Parabacteroides	0.047619
Ruminococcaceae-unkGen	Catenibacterium	0.0470588
Ruminococcaceae-unkGen	Coprobacillus	0.0470588
Ruminococcaceae-unkGen	Megamonas	0.0470588
Ruminococcaceae-unkGen	Pichia	0.0470588
Ruminococcaceae-unkGen	Porphyromonadaceae-unkGen	0.0470588
Ruminococcaceae-unkGen	Megasphaera	0.0465116
Fusobacterium	Candida	0.0454545
Lactobacillus	Candida	0.0454545
Streptococcus	Candida	0.0454545
Catenibacterium	Candida	0.0444444
Peptostreptococcaceae-unkGen	Candida	0.0444444
Porphyromonadaceae-unkGen	Candida	0.0444444
Meyerozyma	Cladosporium	0.0444444
Lachnospiraceae-unkGen	Catenibacterium	0.0408163
Subdoligranulum	Clostridium	0.0408163
Lachnospiraceae-unkGen	Coprobacillus	0.0408163
Megamonas	Lachnospiraceae-unkGen	0.0408163
Peptostreptococcaceae-unkGen	Lachnospiraceae-unkGen	0.0408163
Pichia	Lachnospiraceae-unkGen	0.0408163
Porphyromonadaceae-unkGen	Lachnospiraceae-unkGen	0.0408163
Subdoligranulum	Streptococcus	0.0408163
Catenibacterium	Bacteroides	0.04
Coprobacillus	Bacteroides	0.04
Megamonas	Bacteroides	0.04
Peptostreptococcaceae-unkGen	Bacteroides	0.04
Pichia	Bacteroides	0.04
Porphyromonadaceae-unkGen	Bacteroides	0.04
Subdoligranulum	Catenibacterium	0.04
Subdoligranulum	Coprobacillus	0.04
Subdoligranulum	Megamonas	0.04
Subdoligranulum	Peptostreptococcaceae-unkGen	0.04
Subdoligranulum	Pichia	0.04
Subdoligranulum	Porphyromonadaceae-unkGen	0.04
Roseburia	Clostridium	0.0350877
Roseburia	Collinsella	0.0350877
Roseburia	Fusobacterium	0.0350877
Roseburia	Lachnospira	0.0350877
Roseburia	Lactobacillus	0.0350877
Meyerozyma	Candida	0.0344828
Roseburia	Megamonas	0.0344828
Roseburia	Peptostreptococcaceae-unkGen	0.0344828
Roseburia	Dorea	0.0327869
Saccharomyces	Clostridium	0.0273973
Saccharomyces	Collinsella	0.0273973
Saccharomyces	Fusobacterium	0.0273973
Saccharomyces	Lachnospira	0.0273973
Saccharomyces	Lactobacillus	0.0273973
Streptococcus	Saccharomyces	0.0273973
Saccharomyces	Catenibacterium	0.027027
Saccharomyces	Peptostreptococcaceae-unkGen	0.027027
Saccharomyces	Pichia	0.027027
Saccharomyces	Megasphaera	0.0266667
Saccharomyces	Dorea	0.025974
Collinsella	Alistipes	0.025
IncertaeSedisXIII-unkGen	Alistipes	0.025
Lachnospira	Alistipes	0.025
Lactobacillus	Alistipes	0.025
Streptococcus	Alistipes	0.025
Coprobacillus	Alistipes	0.0246914
Megamonas	Alistipes	0.0246914
Peptostreptococcaceae-unkGen	Alistipes	0.0246914
Faecalibacterium	Clostridium	0.0246914
Faecalibacterium	Collinsella	0.0246914
Fusobacterium	Faecalibacterium	0.0246914
IncertaeSedisXIII-unkGen	Faecalibacterium	0.0246914
Lachnospira	Faecalibacterium	0.0246914
Lactobacillus	Faecalibacterium	0.0246914
TM7_genera_incertae_sedis	Faecalibacterium	0.0246914
Faecalibacterium	Coprobacillus	0.0243902
Parabacteroides	Clostridium	0.0240964
Parabacteroides	Collinsella	0.0240964
Parabacteroides	IncertaeSedisXIII-unkGen	0.0240964
Parabacteroides	Lachnospira	0.0240964
Parabacteroides	Lactobacillus	0.0240964
Streptococcus	Parabacteroides	0.0240964
Ruminococcaceae-unkGen	Clostridium	0.0238095
Parabacteroides	Coprobacillus	0.0238095
Ruminococcaceae-unkGen	IncertaeSedisXIII-unkGen	0.0238095
Ruminococcaceae-unkGen	Lachnospira	0.0238095
Ruminococcaceae-unkGen	Lactobacillus	0.0238095
Peptostreptococcaceae-unkGen	Parabacteroides	0.0238095
Pichia	Parabacteroides	0.0238095
Streptococcus	Ruminococcaceae-unkGen	0.0238095
Parabacteroides	Megasphaera	0.0235294
Ruminococcaceae-unkGen	Peptostreptococcaceae-unkGen	0.0235294
Lachnospiraceae-unkGen	Clostridium	0.0206186
Lachnospiraceae-unkGen	Collinsella	0.0206186
Lachnospiraceae-unkGen	Fusobacterium	0.0206186
Lachnospiraceae-unkGen	IncertaeSedisXIII-unkGen	0.0206186
Lachnospiraceae-unkGen	Lachnospira	0.0206186
Lactobacillus	Lachnospiraceae-unkGen	0.0206186
Streptococcus	Lachnospiraceae-unkGen	0.0206186
TM7_genera_incertae_sedis	Lachnospiraceae-unkGen	0.0206186
Clostridium	Bacteroides	0.020202
Collinsella	Bacteroides	0.020202
Fusobacterium	Bacteroides	0.020202
IncertaeSedisXIII-unkGen	Bacteroides	0.020202
Lachnospira	Bacteroides	0.020202
Lactobacillus	Bacteroides	0.020202
Streptococcus	Bacteroides	0.020202
TM7_genera_incertae_sedis	Bacteroides	0.020202
