# Supplementary material for: Archaea and Fungi of the Human Gut Microbiome: Correlations with Diet and Bacterial Residents
Source: PLoS One. 2013 Jun 17;8(6):e66019. doi: 10.1371/journal.pone.0066019 (PMC3684604; doi:10.1371/journal.pone.0066019)
Supplement: Table S10 — Positively co-varying genera. Archaeal covariation represents the positive relationship detected in Figure 3A. Fungi/Bacterial relationships are the same as the positive relationships represented in Figure 3B. (XLSX) [file pone.0066019.s013.xlsx]

## Sheet: tableS10
Sup Table S10: Positively co-varying genera. Archaeal covariation represents the positive relationship detected in Figure 3A. Fungi/Bacterial relationships are the same as the positive relationships represented in Figure 3B
fungi	Alternaria	bacteria	Anaerostipes
fungi	Aspergillus	bacteria	Megasphaera
fungi	Aspergillus	bacteria	Prevotellaceae - unknown genus
fungi	Aspergillus	bacteria	Veillonelaceae - unknown genus
fungi	Candida	bacteria	Catenibacterium
fungi	Candida	bacteria	Prevotellaceae - unknown genus
fungi	Candida	bacteria	Xylanibacter
fungi	Cystofilobasidium	bacteria	Megasphaera
fungi	Fusarium	bacteria	Dorea
fungi	Fusarium	bacteria	Peptostreptococcaceae - unknown genus
fungi	Meyerozyma	bacteria	Actinomyces
fungi	Meyerozyma	bacteria	Coriobacteriaceae - unknwon genus
fungi	Meyerozyma	bacteria	Ruminococcaceae - unknown genus
fungi	Pichia	bacteria	Syntrophococcus
archaea	Methanobrevibacter	bacteria	Alistipes
archaea	Methanobrevibacter	bacteria	Anaerovorax
archaea	Methanobrevibacter	bacteria	Lactobacilus
archaea	Methanobrevibacter	bacteria	Oxalobacter
archaea	Methanobrevibacter	bacteria	Ruminococcaceae - unknown genus
archaea	Methanobrevibacter	bacteria	Ruminococcus
archaea	Nitrososphaera	bacteria	Bryantella
archaea	Nitrososphaera	bacteria	Coprococcus
archaea	Methanobrevibacter	fungi	Candida
archaea	Nitrososphaera	fungi	Alternaria
archaea	Nitrososphaera	fungi	Cystofilobasidium
archaea	Nitrososphaera	fungi	Debaromyces
